1 Title page

2

3 Title: Developing and testing Advance Choice Document implementation resources for Black African  
4 and Caribbean people with experience of compulsory psychiatric admission

5

6 Jonathan Simpson (corresponding author)

7 Correspondence: [Jonathan.Simpson@kcl.ac.uk](mailto:Jonathan.Simpson@kcl.ac.uk)

8 Health Services and Population Research Department, David Goldberg Centre, King's College London  
9 Institute of Psychiatry, Psychology and Neuroscience, De Crespigny Park, London SE5 8AF, United  
10 Kingdom

11

12 Abigail Babatunde

13 Health Services and Population Research Department, David Goldberg Centre, King's College London  
14 Institute of Psychiatry, Psychology and Neuroscience, De Crespigny Park, London SE5 8AF, United  
15 Kingdom

16

17 Alan Simpson

18 Health Services and Population Research Department, David Goldberg Centre, King's College London  
19 Institute of Psychiatry, Psychology and Neuroscience, De Crespigny Park, London SE5 8AF, United  
20 Kingdom

21

22 Steven Gilbert

23 Steve Gilbert Consulting, Suite 2A, Blackthorn House, St Pauls Square, Birmingham B3 1RL, United  
24 Kingdom

25

26 Alex Ruck Keene

27 39 Essex Chambers, United Kingdom; Institute of Psychiatry, Psychology and Neuroscience, King's

28 College London, United Kingdom

29

30 Lucy Stephenson

31 Department of Psychological Medicine, King's College London Institute of Psychiatry, Psychology and

32 Neuroscience, De Crespigny Park, London, SE5 8AF, United Kingdom

33

34 Kia-Chong Chua

35 Health Service and Population Research Department, David Goldberg Centre, King's College London,

36 Institute of Psychiatry, Psychology and Neuroscience, De Crespigny Park, London, SE5 8AF, United

37 Kingdom

38

39 Gareth Owen

40 Department of Psychological Medicine, King's College London Institute of Psychiatry, Psychology and

41 Neuroscience, De Crespigny Park, London, SE5 8AF, United Kingdom

42

43 Fiona Crowe

44 South London and Maudsley NHS Foundation Trust, United Kingdom

45

46 Pauline Edwards

47 South London and Maudsley NHS Foundation Trust, United Kingdom

48

49 Selena Galloway

50 Maudsley Learning, ORTUS, 82-96 Grove Lane, London, SE5 8SN, United Kingdom

51

52 Megan Fisher

53 Maudsley Learning, ORTUS, 82-96 Grove Lane, London, SE5 8SN, United Kingdom

54

55 Marcela Schilderman

56 Maudsley Learning, ORTUS, 82-96 Grove Lane, London, SE5 8SN, United Kingdom

57

58 Anita Bignell

59 Maudsley Learning, ORTUS, 82-96 Grove Lane, London, SE5 8SN, United Kingdom

60

61 Shubulade Smith

62 South London and Maudsley NHS Foundation Trust, United Kingdom; Royal College of Psychiatrists,

63 United Kingdom

64

65 Claire Henderson

66 Health Services and Population Research Department, David Goldberg Centre, King's College London

67 Institute of Psychiatry, Psychology and Neuroscience, De Crespigny Park, London SE5 8AF, United

68 Kingdom; South London and Maudsley NHS Foundation Trust, United Kingdom

69

70

71

72

73

74

75

## 76 Abstract

77 Background – Advance Choice Documents (ACDs) have been recommended for use in England and  
78 Wales based on evidence from trials that show that they can reduce involuntary hospitalisation,  
79 which disproportionately affects Black African and Caribbean people. Our aim was therefore to  
80 develop and test ACD implementation resources and processes for Black people who have  
81 previously been involuntarily hospitalised and the people that support them.

82 Methods – Resource co-production workshops were held to inform the development of the ACD  
83 template and two types of training for all stakeholders, comprising a Recovery College course and  
84 simulation training. An ACD facilitator then used the ACD template developed through the  
85 workshops to create personalised ACDs with service users and mental health staff over a series of  
86 meetings. Interviews were then conducted with service user and staff participants and analysed to  
87 document their experience of the process and opinions on ACDs. Other implementation strategies  
88 were also employed alongside to support and optimise the creation of ACDs.

89 Results – Nine ACDs were completed and were largely reported as appropriate, acceptable, and  
90 feasible to service users and staff. Both reported it being an empowering process that encouraged  
91 hope for better future treatment and therefore better wellbeing. Uncertainty was also expressed  
92 about the confidence people had that ACDs would be adhered to/honoured, primarily due to staff  
93 workload. The information provision training and the skills training were generally considered to be  
94 informative by trainees.

95 Conclusions – The project has developed an ACD creation resource that was reported as agreeable  
96 to all stakeholders; however, the generalisability of the findings is limited due to the small sample  
97 size. The project also highlights the importance of staff and ACD facilitator capacity and good  
98 therapeutic relationships in ACD completion. Further research is needed to determine the  
99 adjustments needed for large scale use, including for those under age 18 and those under the care  
100 of forensic mental health services; and how to include carers/supporters more in the process.

101 Keywords: Advance Choice Documents, Advance Directives, Advance Statements, Mental Health Act,  
102 Black mental health; Mental health inequity

## 103 Background

104 It is consistently found that Black people, defined as people of Black African and Caribbean heritage  
105 and people of mixed Black heritage, disproportionately have negative experiences of mental health  
106 services in the UK (1–3). This includes more coercive treatment, higher police involvement in  
107 detention in psychiatric hospitals under the Mental Health Act (MHA), and more frequent and  
108 sustained compulsory detentions (1,4) which all act to reduce autonomy. These disparities also exist  
109 alongside poorer mental health outcomes (2,5). Interventions designed to improve the experience of  
110 Black people in mental health services have been insufficient (6). However, written statements of  
111 treatment preferences created in advance of a mental health crisis or relapse have been associated  
112 with reduced compulsory psychiatric admissions (7–9) and reduced periods as an inpatient for Black  
113 people in particular (10). These are referred to as Advance Choice Documents (ACDs) in the 2018  
114 Independent Review of the UK Mental Health Act (MHA Review) and depending on the legislative  
115 context and authors are variously termed Advance Statements, Psychiatric Advance Directives, Joint  
116 Crisis Plans, and Crisis Cards.

117 ACDs can support the autonomy of service users (6,11,12) and facilitate mental health care providers  
118 being held accountable in delivering preferred care. They can potentially address Black service users’  
119 dissatisfaction with services (13), impaired therapeutic alliance and trust, and reduced help seeking  
120 (14,15). ACDs are viewed positively by service users, carers/supporters of people with mental health  
121 difficulties, and mental health staff (MHS) (16,17). The UK government accepted the  
122 recommendation of the use of ACDs in the MHA Review and the parliamentary scrutiny committee  
123 (which provides specialist expertise on draft bills as part of the Committee Office in the House of  
124 Commons) recommended a statutory offer be made to anyone who has previously been detained

125 under the MHA (18). However, in countries where there is legislation supporting the use of ACDs,  
126 such as Scotland and the USA, uptake is low (19).

127 Various reasons have been cited for the lack of creation and use of ACDs, at the level of the service  
128 user, staff, and service (20). A study of Joint Crisis Plan use identified three barriers: 1) lack of  
129 recognition of the benefits of ACDs; 2) not recognising the need for a change in the clinician-service  
130 user relationship, including discussing treatment options and supporting patient choice; and 3)  
131 difficulties in implementation when working across the healthcare system (17).

132 At the time of writing, legislation is still pending; however, ACD implementation has been  
133 incorporated by NHS England into both its Patient and Carer Race Equality Framework reporting  
134 requirements (21) and its recent guidance 'Acute inpatient mental health care for adults and older  
135 adults' (22). ACD creation and use is therefore currently seen as good practice. To support effective  
136 implementation of ACDs by National Health Service (NHS) mental health service providers and for  
137 wider adoption, this implementation resource development and testing research project (the  
138 Advance Statements for Black African and Caribbean people project; AdStAC) consisted of three  
139 phases: stakeholder workshops (to understand views about ACDs) (23); co-production (deciding  
140 what resources were needed to implement ACDs and in what format); and implementation (testing  
141 and revising the implementation resource) (24). This paper focuses on the co-production and  
142 implementation phases, which had the aims:

- 143 1. Co-produce an implementation resource (guidance and training on ACD implementation,  
144 and a modified ACD template)
- 145 2. Test, revise, and re-test the ACD implementation resources developed

146

## 147 Methods

### 148 Design

149 The resource co-production phase comprised three workshops: ACD template design; Recovery

150 College training on understanding ACDs, and simulation training on how to create and use ACDs.

151 The implementation phase comprised Plan-Do-Study-Act cycles (25) to create ACDs, gain feedback,

152 and modify the processes as necessary.

153

### 154 Ethics

155 Approval for the study was granted by the Bradford Leeds NHS Health Research Authority Research

156 Ethics Committee (Research Ethics Committee reference number: 22/YH/0012) on 07/02/2022.

157

### 158 Context

159 The sites where the implementation resources were tested were in four South London local

160 government areas served by an NHS mental health service provider (an NHS Trust) that have,

161 relative to the UK, a high proportion of Black people (range 22.6%-26.8%) (26).

162 The NHS Trust has a Recovery College, which offers courses and workshops taught by people with

163 lived experience of long-term mental health conditions/difficulties and people with expertise by

164 profession. Recovery Colleges are widespread throughout the UK (88 in 2021; (27) and are open to

165 service users, carers/supporters, and MHS to attend. The Trust also has a mental health simulation

166 training centre that offers courses that can be booked by any NHS Trust.

167

## 168 Participants

169 The workshops were open to Black people aged 16+ who had previously been detained under the  
170 MHA; supporters/carers of a Black service user eligible for the project; MHS who may be involved in  
171 supporting the completion of ACDs/refer to ACDs in clinical records/involved in compulsory  
172 admission, and General Practitioners as they are likely to work with people who have severe mental  
173 illness.

174 The targeted groups for the intervention (both sets of training and ACD creation) were Black service  
175 users and the people who support and work with them. Inclusion criteria for service users included:  
176 currently using the NHS Trust services; aged 16+; previously detained at least once under the MHA;  
177 and self-identifying as of Black African and Caribbean heritage, or of mixed Black heritage. For  
178 supporters/carers: aged 16+; informal carers/supporters of eligible service users; and likely to be  
179 named in the ACD. Eligible staff included those who may be involved in completing or referring to  
180 the ACD in clinical records, such as MHS employed by the Trust in acute and community settings,  
181 section 12 (MHA) approved doctors, Approved Mental Health Professionals, advocates, and peer  
182 workers.

183 Purposive sampling was used to recruit service users, carers/supporters, and staff for the co-  
184 production workshops and the trainings; separate recruitment campaigns were carried out for each  
185 sets of training and the ACD creation. Recruitment occurred through presentations to clinical teams  
186 and third-sector organisations (including community groups, voluntary organisations, and faith and  
187 equalities groups). Physical and digital adverts were also distributed to these groups and promoted  
188 via social media platforms. For the creation of ACDs, the first 15 eligible service users expressing  
189 interest were recruited through referrals from MHS and third-sector organisation staff, as well as via  
190 the Trust's consent for contact register. Initially the delivery of sixty ACDs was planned to have  
191 information power for several Plan Do Study Act cycles (25); however, it was only possible to employ  
192 a facilitator part-time and thus we were unable to achieve this sample size within the study period.



193

#### 194 Stakeholder workshops guidance

195 The stakeholder workshops phase of the project provided guidance around the approach to  
196 developing and testing the ACD implementation resource (23). The workshops with service users,  
197 carers/supporters, and MHS highlighted key themes of 'people' 'process' and 'power' as important  
198 when considering ACD implementation.

199 A suggestion from the workshops was to include a section in the ACD that humanises service users  
200 and emphasises that they have a life outside of their diagnosis, to help reduce power imbalances  
201 between mental health service providers and Black service users. Different levels of training where  
202 Black service users, carers/supporters, and MHS learned together, so that everyone received the  
203 same information and learned from one another, was suggested as a means of addressing power  
204 imbalances. The importance of MHS acknowledging the role they or their colleagues may play in the  
205 mistrust Black service users have in the mental healthcare system was also highlighted, and that  
206 understanding a service users background and cultural experience may increase Black service users  
207 trust with services. This involves explicit acknowledgement of historical and individual negative  
208 experiences and listening to the experiences that underline the treatment preferences that people  
209 express for ACD inclusion. The workshops also reinforced the need for an independent facilitator as  
210 they were cited as having the potential to empower Black service users in relation to their care.  
211 Furthermore, their involvement was seen to reduce the extent to which ACD creation adds to the  
212 existing pressures of MHS including workforce shortages, insufficient role delineation, and resource  
213 constraints.

214

## 215 Summary of the co-production and ACD creation strategies

216 A steering committee, a lived experience advisory group, and a staff advisory group provided  
217 guidance throughout the project. Co-production workshops based on stakeholder recommendations  
218 shaped the implementation resource: an ACD template, training, and a manual and job description  
219 for the ACD facilitator (23). Two training courses were developed: a simulation training course and a  
220 Recovery College course, both for service users, staff, and carers/supporters. The ACD facilitator, a  
221 social worker employed by the NHS Trust, was given the manual and created the ACDs of  
222 participating service users with their care team whilst undergoing fortnightly supervision.  
223 Throughout the ACD creation period, monthly staff meetings were held for staff in participating  
224 teams to discuss the project and presentations to clinical teams and third-sector organisations were  
225 also delivered. Awareness videos about ACDs were also created and distributed. Throughout the  
226 project the resource was improved based on data collected through participant interviews and staff  
227 meetings. The strategies not detailed in the methods section can be found in Additional File 1:  
228 Additional project strategies. A Recovery College course and simulation training were developed  
229 instead of modalities requiring less resources as during this project an e-learning resource was  
230 already being developed (28) by colleagues who were being funded by another source, Health  
231 Education England.

232

## 233 Co-production workshops

234 Based on the recommendations from stakeholders, three co-production workshops were conducted  
235 with mixed stakeholder groups to develop: an ACD template; the Trust's Recovery College course to  
236 provide information on ACDs; and skills training delivered with the Trust's Simulation training team  
237 on how stakeholders could create and use an ACD. The development of the ACD template involved  
238 seeking views on existing documents (Crisis PaCK (29), Crisis Plus (30), Joint Crisis Plan (17), and  
239 MAPS (31)). The trainings workshops sought to determine what people thought was needed to make

240 them effective for all stakeholders. The simulation training workshop allowed the Simulation team to  
241 create a bespoke course to include service users and carers/supporters, as they had not previously  
242 run a course for these stakeholders.

243

#### 244 ACD facilitator manual and supervision

245 A co-Principal Investigator (co-PI) (CH) revised a manual drafted after the CRIMSON trial of Joint  
246 Crisis Plans (17) for clinicians taking the role of the independent facilitator leading ACD creation. The  
247 facilitator was independent in that they were not a part of a service user's care team. A facilitator  
248 was recruited from within the NHS Trust and attended the simulation training and fortnightly  
249 supervision via hour long virtual meetings with a project co-PI (CH) who is a psychiatrist. The  
250 facilitator was White/of European descent. We did not attempt to match the facilitator to the  
251 service users by race/ethnicity, this is because it will not be feasible to do so when ACDs are rolled-  
252 out nationally and it is important that all staff are trained to deliver culturally appropriate care (32).  
253 Furthermore, this type of matching ignores the diversity that exists within racial/ethnic groups (32).

254

#### 255 ACD creation

256 The facilitator used the AdStAC ACD template during meetings to create ACDs. Service users were  
257 invited to bring any carers/informal supporters. Meetings could be conducted via video call, phone  
258 call, or in-person. The initial model was a minimum of two meetings, based on previous research  
259 (17), the first including the participant's care-coordinator (a MHS member who co-ordinates a  
260 service user's care across the health and care system) and the second meeting including their  
261 treating psychiatrist; both to support the service user and provide their professional insights.  
262 Meetings were scheduled by the facilitator and the research assistant. Mental health capacity was  
263 assessed by the MHS member present and the facilitator during each meeting. At the end of the  
264 creation of the ACD a confirmation of mental capacity to complete the ACD was recorded on the

265 ACD by the MHS member, which included an assessment of capacity to complete the ACD and an  
266 assessment of capacity to make advance choices about refusing treatments. This was done to  
267 confirm the refusals and requests made in the ACD are reflective of the service user's preferences  
268 when well and that their capacity to do so was confirmed by an MHS involved in their care.

269

#### 270 Training – Recovery College course

271 The Recovery College course was developed to provide an opportunity for stakeholders (Black  
272 service users, carers/supporters, and MHS) to learn about ACDs. Its development was informed by  
273 stakeholder workshops co-led by a peer trainer employed by the Recovery College. The final course  
274 was produced through collaboration between the peer trainer and the AdStAC team (facilitator,  
275 research associate, and research assistant) and delivered by the peer trainer and facilitator with  
276 assistance from the research associate and the research assistant. The peer trainer was Black/of  
277 African descent and the facilitator who was a co-trainer was White/of European descent. It was a  
278 four-day in-person course, running weekly from 10am-3pm. The course included didactic and  
279 interactive components with regular space for discussion and individual and group exercises.  
280 Roleplay exercises were not included in the course and a fictionalised example of a Black service user  
281 was utilised to explore possible considerations when creating an ACD. Whilst the course was  
282 developed to be of use to all stakeholders, the primary target of the course was service users as they  
283 make up the majority of Recovery College students.

284

285

#### 286 Training – Simulation training

287 The simulation training was developed for stakeholders (Black service users, carers/supporters, and  
288 MHS) to develop skills in completing and using ACDs in their existing role. Simulation training

289 replaces or amplifies real experiences with guided experiences that evoke or replicate aspects of the  
290 real world in a fully interactive manner (33). It was a full-day of in-person training comprising  
291 didactic content delivered by a co-PI (CH) with a barrister (ARK) present to address legal questions;  
292 simulated scenarios that simulated ACD completion and use in practice that were run by the training  
293 staff (who are clinicians trained in simulation training) with a professional actor (provided with  
294 detailed instructions for each scenario) playing the service user; and adapted Pendleton’s debrief  
295 sessions facilitated by the training staff. Debriefing followed the format: what went well; what could  
296 have been done differently; and the golden moment - a significant point where what was said/not  
297 said/done changed the direction of the scenario. The training was run twice to allow modifications  
298 based on observation and participant feedback. As mentioned previously, the simulation training  
299 was adapted for service users and carers/supporters to take part in addition to the clinicians usually  
300 targeted; the training was also adapted as a way to train facilitators and other staff who may be  
301 involved in creating or using an ACD.

302

### 303 [Recommended strategies](#)

304 Table 1 shows the AdStAC activities that map onto the strategies to “enhance the adoption,  
305 implementation and sustainability of a clinical program or practice’ and their clusters as defined by  
306 the Expert Recommendations for Implementation Change (ERIC) study (34). See Additional file 2:  
307 Known barriers and recommended strategies for how identified barriers to ACD implementation  
308 characterised by the Consolidated Framework for Implementation Research (CFIR) (35) are  
309 addressed by the project strategies.

310 Table 1. AdStAC strategies and the ERIC clusters and strategies they correspond with

| <b>AdStAC strategies</b> | <b>Cluster</b>                          | <b>Strategies</b>                                              |
|--------------------------|-----------------------------------------|----------------------------------------------------------------|
| ACD template             | Provide interactive assistance          | Provide local technical assistance                             |
| ACD creation             | Use evaluative and iterative strategies | Conduct cyclical small tests of change<br>Promote adaptability |

|                                        |                                                                                                                                                                                   |                                                                                                                                                                                                                                                                                                           |
|----------------------------------------|-----------------------------------------------------------------------------------------------------------------------------------------------------------------------------------|-----------------------------------------------------------------------------------------------------------------------------------------------------------------------------------------------------------------------------------------------------------------------------------------------------------|
|                                        |                                                                                                                                                                                   | <ul style="list-style-type: none"> <li>Tailor strategies</li> <li>Capture and share local knowledge</li> <li>Identify early adopters</li> <li>Provide local technical assistance</li> <li>Purposely re-examine the implementation</li> <li>Use an implementation adviser</li> <li>Facilitation</li> </ul> |
| ACD facilitator manual and supervision | <ul style="list-style-type: none"> <li>Develop stakeholder interrelationships</li> <li>Train and educate stakeholders</li> </ul>                                                  | <ul style="list-style-type: none"> <li>Identify and prepare champions</li> <li>Revise professional roles</li> </ul>                                                                                                                                                                                       |
| Recovery College course                | <ul style="list-style-type: none"> <li>Train and educate stakeholders</li> <li>Use evaluative and iterative strategies</li> </ul>                                                 | <ul style="list-style-type: none"> <li>Conduct ongoing training</li> <li>Purposely re-examine the implementation</li> <li>Make training dynamic</li> </ul>                                                                                                                                                |
| Simulation training                    | <ul style="list-style-type: none"> <li>Train and educate stakeholders</li> <li>Develop stakeholder interrelationships</li> <li>Use evaluative and iterative strategies</li> </ul> | <ul style="list-style-type: none"> <li>Conduct ongoing training</li> <li>Provide ongoing consultation</li> <li>Model and simulate change</li> <li>Purposely re-examine the implementation</li> <li>Make training dynamic</li> </ul>                                                                       |
| Monthly staff meetings                 | <ul style="list-style-type: none"> <li>Train and educate stakeholders</li> <li>Develop stakeholder interrelationships</li> <li>Use evaluative and iterative strategies</li> </ul> | <ul style="list-style-type: none"> <li>Create a learning collaborative</li> <li>Identify early adopters</li> <li>Assess for readiness and identify barriers and facilitators</li> <li>Organize clinician implementation team meetings</li> <li>Conduct educational meetings</li> </ul>                    |
| Presentations and films                | <ul style="list-style-type: none"> <li>Develop stakeholder interrelationships</li> <li>Train and educate stakeholders</li> </ul>                                                  | <ul style="list-style-type: none"> <li>Identify early adopters</li> <li>Capture and share local knowledge</li> <li>Conduct educational outreach visits</li> <li>Develop educational materials</li> </ul>                                                                                                  |
| Advisory groups                        | <ul style="list-style-type: none"> <li>Train and educate stakeholders</li> <li>Develop stakeholder interrelationships</li> </ul>                                                  | <ul style="list-style-type: none"> <li>Conduct ongoing training</li> <li>Provide ongoing consultation</li> <li>Build a coalition</li> <li>Inform local opinion leaders</li> <li>Promote network weaving</li> </ul>                                                                                        |
| Study protocol                         | <ul style="list-style-type: none"> <li>Use evaluative and iterative strategies</li> </ul>                                                                                         | <ul style="list-style-type: none"> <li>Developing a formal implementation blueprint</li> </ul>                                                                                                                                                                                                            |
| Co-production workshops                | <ul style="list-style-type: none"> <li>Use evaluative and iterative strategies</li> <li>Develop stakeholder interrelationships</li> </ul>                                         | <ul style="list-style-type: none"> <li>Assess for readiness and identify barriers and facilitators</li> <li>Conduct local consensus discussions</li> </ul>                                                                                                                                                |

311

312

313 [Measures, data collection, and analysis](#)

314

315 Recovery College course

316 Participants were invited to a group feedback session at the end of the course to share their  
317 opinions of the content and the experience. The researchers took notes of their responses.

318

319 Simulation training

320 Participants were asked to complete pre-course and post-course questionnaires rating their  
321 knowledge, confidence, and understanding of ACDs. Paired samples t-tests were conducted to  
322 compare pre- and post-course answers. Thematic analysis (36) was conducted by a Simulation team  
323 member (SGa) on the open-text survey given, which covered people's experience, what they  
324 learned, and, for staff, perceived influence on their practice.

325

326 ACD creation

327 The Acceptability of Intervention Measure (AIM), Intervention Appropriateness Measure (IAM), and  
328 the Feasibility of Intervention Measure (FIM) were adapted for use by service users and staff  
329 following the authors' instructions (37).

330 Service users' trust in mental health services was assessed using an adapted single item question:  
331 'Generally you can trust mental health staff and services', used previously in research with this  
332 population (38) with responses on a five-point Likert scale.

333 Service users completed baseline and post ACD completion questionnaires including the item on  
334 trust in services. Post ACD completion interviews of service users and staff covered acceptability,  
335 appropriateness, and feasibility of the ACDs they were involved in creating using AIM, IAM and FIM  
336 and open-ended questions about their experience and motivation to complete an ACD. Interviews  
337 were recorded and transcribed verbatim for thematic analysis.

338 The ACD facilitator logged the profession and role of meeting attendees, the number and duration of  
339 meetings, and meeting locations. Descriptive statistics were calculated for the lengths of ACD  
340 creation meetings, their quantity, who attended, and their location. ACD content was coded for  
341 refusals and requests regarding treatment preference when in contact with mental health services  
342 during relapse of illness or a crisis.

343

#### 344 [ACD creation interviews](#)

345 All ACD creation interviews were conducted by JS. Interview transcripts were then analysed using  
346 thematic analysis (36). This entailed transcripts being coded using NVivo14 and initial themes and a  
347 coding framework being developed. The transcripts were then revisited to further develop the  
348 themes and coding framework. Once this was completed ABa checked the coding framework against  
349 the transcripts to see whether they felt there needed to be any additions or amendments to codes  
350 or theme names. JS and ABa are both Black/of African descent. The wider research team also  
351 commented on the themes during discussion on quotations to use for the paper.

352

## 353 [Results](#)

### 354 [Co-production workshops: resource development](#)

355 The ACD template workshop led to the addition of a 'Who I am' section where people could include  
356 content important to their sense of identity that they wanted others to know. It was felt that this  
357 type of information could humanise service users and lead to less stigmatisation and more respectful  
358 treatment during a relapse or crisis. Later feedback from various sources enabled the template to be  
359 modified to include questions around advocacy, rephrasing of its wording to be more sensitive to  
360 people's individual experiences, and flow of its presentation.



361 The ACD template included the sections personal details (including main difficulties, or  
362 considerations, etc.); who I am; care in crisis (including key signs that I am in crisis, helpful things  
363 when I am in crisis, key things people misunderstand about me, etc.); preferences for particular  
364 services and instances (e.g. community/home treatment team care, Hospital care, Mental Health  
365 medical treatments, etc.); Practical help (care arrangements for dependent(s)/pet(s), whom to  
366 inform about admission, etc.); how different people can access the document (e.g. ambulance  
367 services, mental health staff, general hospital, etc.); confirmation of mental capacity to complete the  
368 ACD; summary of views on the ACD of people involved in creating the ACD; and a record of the  
369 people involved in creating the ACD, their role, and the date of their final review of the ACD.

370 The Simulation team determined stakeholders wanted unified learning objectives across roles and  
371 then drafted learning objectives. For example, participants expressed the importance of learners  
372 understanding the document was patient-led and not like previous documents, like care plans, so  
373 one learning objective became “implement a model of decision making that is truly shared between  
374 service users, carers, and healthcare professionals when making ACDs”. The team also identified  
375 beneficial and acceptable content for simulation scenarios. For example, cultural sensitivity and  
376 service user individuality were two desired themes, so the ACD creation scenarios included specific  
377 religious and dietary requests, and the scenario actor was briefed to become less distressed if  
378 participants were attentive to related content in the ACD.

379 The Recovery College course was determined to require four sessions to cover learning objectives  
380 important for stakeholders.

381

## 382 **Training - Simulation training**

383 Two separate trainings occurred; the second was adapted to allow a later start time to facilitate  
384 access by some participants, for example those on sedative medication or those who had

385 care/support commitments. Police input was sought for the development of training, but this was  
386 not obtained during the project.

387

### 388 Demographics

389 The simulation training was attended by 12 trainees in total, nine recorded as female, three as male,  
390 most were over 55 years old (n=5), and the majority identified as of a Black ethnic group (n=9). The  
391 professions recorded were nursing (n=1); medical (n=1); allied health professional (social  
392 worker[n=1]); other clinical professional (peer support [n=1]); other non-clinical professional (carer  
393 [n=2], senior management [n=1], peer advocate [n=1], volunteer visitor [n=1]). Two people did not  
394 answer the profession question. Whether someone was a service user was not recorded as this was  
395 not data routinely collected by the Simulation team, which hitherto had only delivered courses for  
396 professionals. No trainees from the simulation training took part in the Recovery College course.

397

### 398 Quantitative findings

399 Paired sample t-tests were conducted on the responses to pre- and post-training questionnaires, see  
400 Table 2 for results. Higher scores denote increase in people's rated confidence, understanding, and  
401 ability. Six trainees were excluded for providing incomplete responses for their learning outcomes in  
402 the evaluation survey, the resulting data was insufficient for inclusion into the analysis.

403

#### 404 Table 2. T-test results of pre-and post- simulation training questionnaire scores

405

### 406 Qualitative findings

407 Four themes were identified through thematic analysis, including increased knowledge from  
408 facilitators and speakers; helpfulness of the activities; learning the importance of teamwork and

409 collaboration; and desire for further exploration within the course (including medication refusal,  
410 simulation exercises, and how ACDs will work in practice).

411

## 412 Training - Recovery College course

413

### 414 Demographics

415 The Recovery College course was attended by 12 trainees, ten recorded as female, two recorded as  
416 male, with a mean age of 52 (range: 41-62yrs). The ethnicities of the trainees were not recorded as  
417 this information is not routinely collected by the Recovery College. Trainees included people  
418 currently accessing mental health services (n=5); carers/supporters (n=3); third-sector organisation  
419 staff (n=2), and peer supporters and lived experience advisors & experts (n=2). No mental healthcare  
420 professionals attended. Six people attended all sessions, four people attended three sessions, one  
421 attended two sessions, and one attended one session. No trainees from the Recovery College course  
422 took part in the simulation training.

423

### 424 Feedback

425 Trainees described the course as informative and appreciated it being co-facilitated by a peer trainer  
426 who detailed their own views and experiences, as it made them relatable and created a safe space  
427 where trainees felt free to express themselves. Another favoured element was how interactive the  
428 sessions were. However, trainees stated the ACD and what it relates to makes it a 'heavy' document,  
429 which made the course feel somewhat challenging and so there was a need for a more digestible  
430 approach.

431 Generally, trainees felt more knowledgeable about how to approach making their own ACD with the  
432 appropriate people, such as MHS. Additionally, they felt they could support someone else with the

433 making of their ACD. Trainees also felt the course would benefit friends and family of service users;  
434 peer support workers; voluntary organisation staff; carers; and mental and general health staff.

435 Trainees remarked that four days of training was a big commitment, as was the session length  
436 (10am-3pm). Views were mixed concerning clinical staff attendance: some thought there should be  
437 the option of a group including staff, due to the importance of having stakeholders learn from one  
438 another, whilst others did not want this as they did not feel it would be possible to create as  
439 supportive and safe a space with staff present.

440

#### 441 [ACD creation meetings](#)

442

443 See Table 3 for demographics of service user participants. The race/ethnicity of MHS that took part  
444 in meetings was not recorded. No service user participants that created ACDs attended the Recovery  
445 College course or the simulation training before or after the creation meetings. Nine ACDs were  
446 made through an average of two meetings, lasting for an average of 62 minutes. Of the 20 meetings  
447 held, 11 were attended by care-coordinators, four by consultants, four by psychologists, one by a  
448 case management officer, and one by a team leader. Six meetings took place in-person, and 12 by  
449 video call. Six ACDs were not completed due to lack of responsiveness from care teams to setting up  
450 meetings or providing input to ACDs through alternative methods offered; care team members not  
451 attending agreed meetings; numerous care team changes, facilitator responsiveness, and service  
452 user disengagement. Typically, it was simpler to arrange meetings with psychologists, followed by  
453 care-coordinators, then consultant psychiatrists, with the latter being more likely to attend once  
454 given the option of attending for 15 minutes instead of the full hour. Approaches to scheduling were  
455 adjusted with the aim of reducing delay before meetings were held and the ACD template adjusted  
456 to maximise information gathering.

457

458 The most frequent request made in ACDs were support (e.g., support groups, cultural support);  
 459 whom to notify as contact persons; strategies for de-escalation and reduction of coercive measures;  
 460 additional information and well-being factors (e.g., being outdoors, creative activities, support to  
 461 take medication); request for other treatment (e.g., psychotherapy); request for medication form;  
 462 refusal of specific medication; and request for hospital alternative (e.g., home treatment, outpatient  
 463 treatment) (Table 4).

464

465 **Table 3. Demographics of service user participants**

466

467

468

469

470

471

472

473

474 **Table 4. ACD Requests and refusals**

| Main theme                          | Type of request    |                                                                               | Total (n) |
|-------------------------------------|--------------------|-------------------------------------------------------------------------------|-----------|
|                                     | Subtheme(s)        |                                                                               |           |
| <b>Treatment setting preference</b> | Treatment location | General request for and consent to hospitalisation                            | 0         |
|                                     |                    | Request for certain hospitals and wards                                       | 5         |
|                                     |                    | Refusal of certain hospitals and wards                                        | 5         |
|                                     |                    | Request for hospital alternative (e.g., home treatment, outpatient treatment) | 8         |

|                              |                                                                                                                       |                                                                                                               |   |
|------------------------------|-----------------------------------------------------------------------------------------------------------------------|---------------------------------------------------------------------------------------------------------------|---|
|                              |                                                                                                                       | General refusal of hospitalisation                                                                            | 0 |
|                              |                                                                                                                       | Involvement of specific health care professionals (e.g., regular treating psychiatrist, general practitioner) | 1 |
|                              | Police involvement                                                                                                    | Acceptance of police                                                                                          | 0 |
|                              |                                                                                                                       | Avoid police                                                                                                  | 2 |
| <b>Treatment preferences</b> | Medication preferences                                                                                                | Request for specific medication                                                                               | 3 |
|                              |                                                                                                                       | Refusal of specific medication                                                                                | 8 |
|                              | Preferences regarding ECT                                                                                             | Request for medication form                                                                                   | 7 |
|                              |                                                                                                                       | ECT request or consent                                                                                        | 0 |
|                              |                                                                                                                       | ECT refusal                                                                                                   | 1 |
|                              | Other treatment preferences                                                                                           | Request for other treatment (e.g., psychotherapy)                                                             | 9 |
|                              |                                                                                                                       | Refusal of other treatment                                                                                    | 0 |
|                              | Refusal of all psychiatric treatment or medication                                                                    | Yes                                                                                                           | 0 |
|                              |                                                                                                                       | No                                                                                                            | 9 |
|                              |                                                                                                                       | Instructions regarding physical health conditions                                                             |   |
|                              | Additional information and well-being factors (e.g., being outdoors, creative activities, support to take medication) |                                                                                                               | 9 |
| <b>Coercion</b>              | Strategies for de-escalation and reduction of coercive measures                                                       |                                                                                                               | 7 |
|                              | Preferences regarding coercive measures                                                                               | Consent to and ranking of specific coercive measures                                                          | 0 |
|                              |                                                                                                                       | Refusal of specific coercive measures                                                                         | 3 |
|                              |                                                                                                                       | Refusal of all coercive measures                                                                              | 0 |
|                              |                                                                                                                       | Whom to notify as contact persons                                                                             | 8 |
|                              |                                                                                                                       | Whom not to notify                                                                                            | 3 |
| <b>Social instructions</b>   | Social preferences                                                                                                    | Support (e.g., support groups, cultural support)                                                              | 7 |
|                              | Personal matters (e.g., finances, pets, dependents) + work, house                                                     |                                                                                                               | 5 |

475

476 Completed ACDs were stored in the participant’s electronic medical records as a PDF file, with an  
 477 alert on the face page of the record stating ‘X has made an Advance Choice Document (collaborative  
 478 advance directive). Stored under correspondence date xxxx. STAFF MUST READ if: they present in  
 479 crisis, a MHA Assessment is being undertaken, they are admitted to a ward, inpatient care planning  
 480 is required. It contains Advance Statements valid under [Mental Capacity Act] and MHA Code of  
 481 Practice guidelines.’

482

483 [ACD creation interviews](#)

484

485 **Demographics**

486 Seven service users and five staff took part in the post ACD completion interviews. Two service user  
487 participants who had also completed their ACDs did not take part in these interviews, as one was  
488 unwell, and one declined to take part.

489

490 **Trust, acceptability, appropriateness, and feasibility**

491 At baseline, service users responded most frequently with 'Agree' when asked whether they can  
492 trust services. At post-completion 'Agree' and 'Neither agree nor disagree' were the most frequent  
493 responses, with one respondent changing from 'Disagree' to 'Neither agree nor disagree' (see Table  
494 5). For service users, 'Agree' was the most common response across acceptability, appropriateness,  
495 and feasibility for their ACDs. 'Completely agree' was the second most frequent for acceptability and  
496 feasibility had the greatest number of 'Neither agree nor disagree' answers (see Additional file 3:  
497 Service user ratings of ACDs). For staff, across appropriateness and acceptability 'Completely agree'  
498 was the most common response. 'Agree' was most frequent for feasibility, which elicited the only  
499 neither 'Neither agree nor disagree' response (see Additional file 4: Staff ratings of ACDs).

500 Table 5. Service user ratings of their trust of services at three study points

|     | Baseline               | Post-completion        | Second Follow-up       |
|-----|------------------------|------------------------|------------------------|
| SU1 | Strongly agree         | Strongly agree         | N/A                    |
| SU2 | Agree                  | Agree                  | N/A                    |
| SU3 | Agree                  | Agree                  | N/A                    |
| SU4 | Agree                  | Agree                  | N/A                    |
| SU5 | Disagree               | Neither agree/disagree | N/A                    |
| SU6 | Neither agree/disagree | Neither agree/disagree | N/A                    |
| SU7 | Neither agree/disagree | Neither agree/disagree | Neither agree/disagree |
| SU8 | Disagree               | N/A                    | N/A                    |
| SU9 | Strongly agree         | N/A                    | N/A                    |

501

502

503 Service user interviews

504 See Table 6 for service user interview excerpts, and Additional file 6: Service user interview excerpts  
505 for those not listed here.

506

507 *Process*

508

509 *Facilitator involvement*

510

511 Generally, service users appreciated the presence of the facilitator. They cited their prompts as  
512 helpful, although service user SU6 stated that being reminded more explicitly that the ACD was a  
513 living document more often would be good. The presence and guidance of the facilitator was also  
514 seen as supportive and caring. The ease of someone else recording and summarising was also  
515 highlighted as a positive.

516

517 *Staff involvement*

518 Opinions on involvement of a service user's care team varied. Some saw it as helpful as they were  
519 able to provide important insight, and some cited their familiar presence as helping them participate  
520 in the creation meetings. Others had a neutral opinion, or noted that attending staff had no input in  
521 the meetings, without expressing any opinion on this. The brevity of staff attendance and their  
522 absence in some cases were mentioned but no explicit evaluation of this was given.

523

524 *Demands*

525 Some interviewees described the meetings as emotionally demanding and the cause of unease; SU3  
526 stated it can be a daunting task. No participants reported feeling pressured in meetings when asked;  
527 however, SU7 didn't feel able to challenge the facilitator's summary when asked to review an initial  
528 draft of their ACD. The length of meetings was seen as appropriate for the content of the meetings



529 and not demanding, but the time between meetings and between the last meeting and receiving  
530 ACDs to review was described as long.

531

### 532 *Quality of ACD*

533 Service users described their ACD as well made, comprehensive, and a good summary of who they  
534 were as a person and their experience. However, SU2 stressed that the ACD was only an indicator of  
535 who they were. Most asked for corrections to be made but most did not express an issue with what  
536 had to be adjusted. However, SU7 expressed that they felt their racialised experience of services, an  
537 experience important to them, was left out. After edits to their ACD were made in response to this,  
538 SU7 felt satisfied with the final ACD.

539

### 540 *Benefits*

541

### 542 *Drive to complete*

543 Participants cited multiple reasons for choosing to make an ACD, including being heard and  
544 increasing their autonomy. A desire to increase understanding was also mentioned multiple times,  
545 primarily in staff, but also family. Related to this, some people also wanted to avoid the repetition of  
546 coercive treatment and negative experiences with mental health services.

547

### 548 *On taking part*

549 Service users reported positive feelings for themselves and towards services. For services,  
550 participants detailed having a confidence in them, feeling listened to and respected, and being  
551 appreciative of having the opportunity to express themselves. SU3 however had an unchanged  
552 opinion of services, as they reported previously having confidence in them. Participants expressed  
553 finding the experience empowering and having a greater sense of control and feeling more involved  
554 in their care. Some found the experience itself enjoyable, for SU1 this was because they were being

555 heard. Others were pleased with themselves for taking part and shared that it was a way to  
556 appreciate themselves due to the reflection involved, and others felt they had increased in self-  
557 confidence. The ACD creation process was also appreciated for its personalised approach, which was  
558 described as humanising by some. SU7 also mentioned how the ACD provided reassurance for  
559 carers/supporters, which was of value to them.

560

### 561 *Hope*

562 Participants shared that they were hopeful creating the ACD would bring about better treatment for  
563 themselves when in contact with mental health services and be a part of a more holistic approach to  
564 their care. SU7 also described the potential of ACDs to reduce police aggression and violence against  
565 people from minoritised groups.

566 When asked what they would say to someone considering ACDs, participants cited the support or  
567 facilitation of support for their mental health needs as a reason to complete it. Additional reasons  
568 were its ability to increase understanding of who they are as an individual and to have their care  
569 personalised. Related to this, participants also mentioned having more say in their care and  
570 empowering themselves. The ACD was also spoken of in terms of safety and it being a safety net,  
571 with SU7 describing it as a practical solution to racial inequalities.

572

### 573 *Honouring*

574

### 575 *Uncertainty*

576 Uncertainty was widely expressed about whether ACDs would be used. Service users stated either  
577 they could not know until it was in practice or that they weren't familiar enough with ACDs to say.  
578 Some said their satisfaction with creating an ACD was dependent upon how it would be adhered  
579 to/honoured. Others were sceptical about whether it would be used, with some citing having low  
580 confidence in services or police using it, due to previous experiences. Participants also expressed

581 uncertainty when asked what they would say to people considering ACDs, because they themselves  
582 were sceptical or inexperienced with ACDs. However, SU4 and SU1 had a general confidence it  
583 would be used.

584

#### 585 **Influencing factors**

586 Participants felt the honouring of their ACDs depended upon staff training and awareness of ACDs.  
587 Furthermore, participants felt how staff and police regarded ACDs would have an impact on whether  
588 they were utilised. SU7 felt that for ACDs to be honoured an advocate would need to be involved.  
589 SU1 believed their own behaviour would have an influence on whether people would adhere to their  
590 ACD. Participants also generally felt that staff capacity and services in general being overwhelmed  
591 presented a risk of their ACD not being honoured.

592

#### 593 **Table 6: Service user interview excerpts**

594

#### 595 **Staff interviews**

596

597 See Table 7 for staff interview excerpts, and Additional file 7: Service user interview excerpts for  
598 those not listed here.

599

#### 600 **Process**

601

#### 602 **Approach**

603 Staff remarked how the process of creating the ACD felt collaborative in a way that felt personalised  
604 to the service user. Staff also approved of the ease of the process and the flexibility in respect to  
605 scheduling and meeting location. Whilst participants said no improvements were needed, it was

606 mentioned how the delay in meetings and getting completed ACDs back was an issue that could  
607 impact on service user motivation.

608

#### 609 **Care team involvement**

610 Some participants highlighted the need for a member of the care team to be present in meetings as  
611 their insight can be uniquely useful; particularly if a service user is being reviewed, or alternatively an  
612 independent facilitator would need to be vigilant about this. Additionally, staff noted that a service  
613 user's wellness was a factor that needed to be monitored and that their care team was well suited to  
614 advise on this. Some staff shared that they did not feel an independent facilitator was essential for  
615 the ACD to be created; MHS6 felt it was unlikely they'll be available when ACDs are upscaled, so the  
616 process needs to be adjusted for care teams to facilitate ACD creation.

617

#### 618 **Independent facilitator impact**

619 Staff shared how the presence of the facilitator as an independent party allowed for a safe space to  
620 be created, which was supportive for both staff and service users. In this space it was said that there  
621 was an increased sense of openness that led to conversations that were not had in regular  
622 interactions. The involvement of a neutral party was also seen as beneficial in reducing the impact of  
623 staff conflict of interest, who may have their own priorities regarding a service user's care that differ  
624 to the service users. Staff frequently commented on the positive input of the facilitator and their  
625 sensitivity in dealing with challenging topics and their making the process a personalised experience.

626

#### 627 **Benefits**

628

#### 629 **For staff**

630 Generally, participants saw the ACD as informative and a useful tool, with MHS3 saying that it could  
631 provide targets where it was not previously known what works for service users or there was a lack

632 of understanding about an aspect of their life. MHS4 also shared how the project being focused on  
633 Black people and then creating the ACD with that in mind made them think about how someone's  
634 colour or culture could impact their experience of mental health services, in a way they hadn't  
635 considered before in their work. The process itself was also said to be rewarding for staff, with MHS1  
636 finding it enjoyable.

637

#### 638 *For service users*

639 Staff saw the ACDs as an opportunity for service users to: be heard and have more input in their  
640 care; to prepare for their future care; preserve their rights during their contact with services; and to  
641 be given a sense of safety that they will be looked after in their preferred way. ACDs were seen as  
642 part of a holistic approach to care through more personalised action, and MHS3 noted they saw  
643 ACDs as a continuation of community care. Staff mentioned the importance of ACDs being  
644 completed by Black service users due to social inequities and hoped that having ACDs would provide  
645 them the confidence to access services when needed. MHS5 raised that due to the sensitive work  
646 involved in creating an ACD and the hope that it can offer, not honouring an ACD would have a  
647 significantly negative impact on service users.

648

#### 649 *Application*

650

#### 651 *Barriers*

652 Staff reported they would reserve stating how confident they were in ACDs until they were used in  
653 practice. They mentioned that whether ACDs would be honoured would be dependent on both  
654 requests and context, for example, which team was involved and in which clinical setting.  
655 Communication on wards particularly was highlighted as a barrier, as was collaboration between  
656 teams. MHS3 cited the latter as requiring proactiveness with ACDs. Staff thought that it would be  
657 easier to communicate the need to check an ACD with community mental health teams than with

658 ward teams, and MHS5 felt confident the community teams would access it. Staff were unsure how  
659 police would interact with ACDs, due to not having much contact with them, but mentioned how  
660 police are busy and react to things quickly and that this would likely affect whether they would  
661 check whether someone has an ACD or adhere to it. MHS4 felt that if a service user had recurrent  
662 contact with police, they may be prompted to access their ACD.

663

#### 664 Enablers

665 Staff awareness of a service user having an ACD or knowing what they were and how to use them  
666 was seen as key to them being honoured. ACD champions were one solution suggested to ensure  
667 clinical teams were made aware and accessed them. Participants also expressed concerns about how  
668 easily they could be accessed. They wondered what their visibility would be like on the electronic  
669 clinical records system used and highlighted the importance of them not being lost in patient notes.  
670 Staff also stressed the importance of the ACD being connected with legislation as an important part  
671 in garnering interest and faith in ACDs for service users. Generally, a wider rollout was sought to  
672 realise the potential benefits of ACDs. ACD completion when service users were well was underlined  
673 as crucial for achieving the benefits of ACDs for service users.

#### 674 Table 7: Staff interview excerpts

675

#### 676 Discussion

677

678 The project set out to develop implementation resources to get ACDs to work for Black people and  
679 those that support them. An ACD template, two sets of training, and a facilitation process were  
680 developed and used in the creation of ACDs and the development of awareness and skills associated

681 with ACDs and their use. In addition to gaining insights into the meaning of ACDs for service users  
682 and staff, the project identified key issues for the upscaling and routine use of ACDs.

683 Training of staff may not be achievable through the developed courses. The Recovery College  
684 course, which was developed into a four-day course, had no clinical staff attendance, likely due to  
685 the time commitment required and lack of an official requirement to attend. This absence does not  
686 fulfil the joint learning requested by stakeholders in workshops; however, the trainees largely  
687 accepted the lack of staff attending and some preferred this. Simulation training trainees generally  
688 reported finding the training useful for practical application in various stages of creating and using  
689 ACDs. A noteworthy finding was that they felt less confident to complete ACDs than before they  
690 started. This could be due to them believing they knew what ACDs were beforehand and then  
691 finding that they were different to what they expected, and perhaps more complex. The reach of  
692 this training's observed value may be limited as simulation training needs to be delivered in small  
693 groups.

694 The completion of the ACD creation meetings requires a degree of swiftness from staff to maintain  
695 momentum and to avoid fluctuation in a service user's mental state that results in them being  
696 deemed to not have capacity to create an ACD, which can be hard to achieve. Service users  
697 expressed how demanding the process could be; and staff believed it was important to time the  
698 meetings for when service users were well and to complete ACDs promptly to avoid demotivation.  
699 However, staff cited high workload and higher priorities as reasons for not attending or rearranging  
700 meetings, which increased time spent arranging meetings.

701 As there were substantial delays in setting up first or second meetings, due to lack of staff  
702 availability or response, some meetings went ahead without staff present. It was found that the  
703 presence of a care-coordinator was not always necessary for productive meetings; however, one  
704 instance showed that having someone who knew the service user at the first meeting was crucial in

705 establishing the context of discussions. Additionally, although staff presence was sometimes not  
706 considered vital by service users, some noted that it was reassuring.

707 Staff generally approved of the process of creating ACDs and described the creation and use of ACDs  
708 as well aligned to community care practice. This contrasts previous findings of resistance to the role  
709 of the facilitator, doubts about ability to follow preferences, and beliefs that the process duplicates  
710 existing practice (20). However, it does support findings that some MHS believe having an  
711 independent facilitator can lead to the successful completion of ACDs, particularly due to their  
712 impartiality and having time to complete the document (39). Although some staff felt that a service  
713 user's care team could facilitate ACD creation, this was partly due to scepticism regarding the use of  
714 facilitators being scaled-up rather than resistance to their role.

715 Though service users generally reported positive views about the meetings, the act of creating an  
716 ACD, and their ACD, echoing previous research findings (17,29,40), people from historically  
717 marginalised groups and those who have individual negative experiences with services may still find  
718 it difficult to speak freely when invited to by MHS. Discussion of racialised experience is not routine,  
719 as exemplified by the staff member who required prompting to consider how a service user's lived  
720 reality as a Black person may influence their experience of mental health care, and the service user  
721 who had an additional meeting to discuss following encouragement from JS during an interview. JS's  
722 being Black/of African descent may have generally encouraged service user participants to discuss  
723 their racialised experiences to the extent that they did, and at various points during the project  
724 participants did mention JS's race/ethnicity as a favourable part of the project. This project may also  
725 have partly facilitated this, through the project title and its self-identified race/ethnicity-based  
726 eligibility criterion, but project observations suggests that more explicit encouragement is needed.  
727 This may cause discomfort in meetings already found to be challenging by service users; we  
728 therefore suggest that this encouragement is made in initial offers to make an ACD, so that service



729 users can consider discussing these experiences beforehand, and that staff and facilitator training  
730 covers the need to discuss these experiences as part of ACD creation.

731 The content of service user ACDs varied from including personally known people in their mental  
732 health care, reducing staff coercion and how to do this, the way they received their medication,  
733 what medication they did not want, specific requests for psychotherapy or art therapy, letting MHS  
734 know what additional things help them, such as particular creative activities or being outside, and  
735 requests for treatment at home when possible. Such requests if honoured have the potential to lead  
736 to the strengthening of therapeutic relationships, fewer hospital admissions, and an increased sense  
737 of safety and being supported in a personal manner. It is noteworthy that there were no refusals of  
738 all coercive measures, but none consented to or ranked any particular measures. Also, a minority  
739 mentioned the police in their ACD, despite either having past interactions with police or recognising  
740 the possibility of their involvement in the future.

741 Both service users and staff reserved judgement on the likelihood of ACD content being honoured,  
742 with staff describing awareness, content, and service context as influencing this. Staff capacity was  
743 also cited as an issue in ACDs being honoured, due to staff overwhelm and the NHS being under  
744 pressure overall. Advocates and staff ACD champions were suggested to help with staff accessing  
745 and honouring ACDs in busy environments such as wards. Champions on wards are generally  
746 accepted as playing a significant role in implementation (41,42) and culturally appropriate advocates  
747 have been said to be useful in having service users' needs met and rights adhered to (43). These  
748 points highlight how ultimately for ACDs to work for Black service users, in addition to specific  
749 strategies, a culture prioritising the service user's voice is essential. This further highlights the need  
750 for ACDs to have legislative backing and having considered reasoning for not honouring them.  
751 Scepticism also existed around whether police would read or honour ACDs irrespective of training,  
752 due to them not seeing it as priority. As the ACDs made as part of this project were only accessible

753 via medical records, and police cannot access these, participants were not asked whether they  
754 wanted to specifically permit or refuse police accessing their ACDs.

755

## 756 Strengths and limitations

757 Carrying out this study within one service provider allowed the creation of a resource that is feasible  
758 for use in its context and was largely acceptable to participating service users and staff. The focus on  
759 Black service users also enabled the development of resources that aim to improve mental health  
760 equity, resources well suited for further improvements and adaptations with this aim in mind. The  
761 project therefore established a useful foundation to apply and evaluate these resources on a larger  
762 scale. The ACD creation model developed in this project also presents a means to adhere to the  
763 supported decision mandate of the United Nations' Convention on the Rights of Persons with  
764 Disabilities (44). This is due to its collaborative, service user led nature that supports people with  
765 long-term mental health difficulties to exercise their right to refuse and request treatment,  
766 particularly in instances where they may be deemed to not have the capacity to make such  
767 decisions. However, due to the context specific nature of the study, its applicability to other mental  
768 health services provider contexts may be limited; for example, while Recovery Colleges are  
769 widespread (27,45), access to simulation training may vary. The close involvement of researchers  
770 throughout the project also means that the extent to which the results reflect use of the  
771 implementation resource in typical practice is limited. The small sample size also limits the findings'  
772 generalisability, and the lack of staff attendance at the trainings limits what can be said about the  
773 usefulness for the everyday practice of staff and whether this varies between staff types. No forensic  
774 service users or staff were included in the study despite attempts to do so and given the  
775 disproportionate number of Black people in such services (46), the resources need to be piloted and  
776 amended as required for use within these services. Although carers/supporters were involved in the  
777 co-production phase and attended both sets of training, none were included in ACD creation

778 meetings. Further study is needed to find out why and how better to include them. The confidence  
779 in the findings from the AIM, IAM, and FIM implementation outcome measures is also limited, due  
780 to the repetitive nature of the questions. Importantly, the time frame of this project did not allow  
781 follow up to ascertain rates of access to and honouring of ACDs, nor to develop and test a process  
782 for their review. The Advance Choice Documents Implementation project (47) which is run by our  
783 group and is based on AdStAC seeks to expand on the findings of AdStAC, in part by addressing such  
784 limitations as detailed here.

785

## 786 Implications

787 Adaptations are likely to be needed to optimise implementability in other services and in other  
788 populations. In addition to the need to adapt and pilot ACDs in forensic services, this will also be  
789 needed for child and adolescent mental health services and those for older adults.

790 Further implementation studies will need to consider both additional strategies and research  
791 questions. Besides training that can easily be accessed by staff, other strategies are likely to be  
792 needed to increase the agility of community staff to respond to requests for ACDs. The digitisation of  
793 ACDs is likely to aid efficiencies in ACD creation and development, quality, safety monitoring, and  
794 routine clinical notes retrieval, and so should also be considered an important part of ACD  
795 implementation. Strategies are also needed to enable discussions about care influenced by other  
796 characteristics such as gender identity, sexuality, religion, etc. One possibility is that the role of the  
797 independent facilitator be expanded to promote this change in culture. Likewise, strategies will be  
798 needed to encourage relevant professionals to follow the content. While we did not encounter the  
799 same attitudinal barriers that have affected previous research, we cannot assume they are now non-  
800 existent. Furthermore, it still needs to be determined whether trial findings regarding the use of the  
801 MHA and therapeutic alliance can be replicated through routine use, even with implementation  
802 resources and strategies in place, for example due to trial samples not being representative of wider

803 populations. This includes the question of whether ACDs can improve mental health equity. These  
804 questions need to be approached with observational and quasi-experimental study designs. Finally,  
805 there is no evidence about predictors of whether ACD content is accessed and followed, including  
806 characteristics of services, mental health staff, service users, or ACD content. This question requires  
807 large sample sizes, follow up lengths sufficient for periods when ACDs should be accessed, and  
808 informatics work. Future work by our group will address these questions to fully realise the potential  
809 of ACDs in addressing inequity in mental health care and enhancing the impact of mental health  
810 services more widely.

811

## 812 Abbreviations

813

814 AdStAC – Advance Statements for Black African and Caribbean people project

815 ACD – Advance Choice Document

816 AIM - Acceptability of Intervention Measure

817 CFIR - Consolidated Framework for Implementation Research

818 co-PI – co-principal investigator

819 ERIC - Expert Recommendations for Implementation Change

820 FIM - Feasibility of Intervention Measure

821 IAM - Intervention Appropriateness Measure

822 MHA – Mental health act

823 MHA review - 2018 Independent Review of the UK Mental Health Act

824 MHS – Mental health staff

825 NHS – National Health Service

826

## 827 References

828 1. Barnett P, Mackay E, Matthews H, Gate R, Greenwood H, Ariyo K, et al. Ethnic variations in  
829 compulsory detention under the Mental Health Act: a systematic review and meta-analysis of  
830 international data. *Lancet Psychiatry*. 2019 Apr;6(4):305–17.

831 2. National Collaborating Centre for Mental Health. Ethnic Inequalities in Improving Access to  
832 Psychological Therapies (IAPT) [Internet]. 2023 [cited 2024 Feb 9]. Available from:

- 833 [https://www.nhs.uk/wp-content/uploads/2023/10/Ethnic-Inequalities-in-Improving-](https://www.nhs.uk/wp-content/uploads/2023/10/Ethnic-Inequalities-in-Improving-Access-to-Psychological-Therapies-IAPT-Full-report.pdf)  
834 [Access-to-Psychological-Therapies-IAPT.Full-report.pdf](https://www.nhs.uk/wp-content/uploads/2023/10/Ethnic-Inequalities-in-Improving-Access-to-Psychological-Therapies-IAPT-Full-report.pdf)
- 835 3. Bansal N, Karlsen S, Sashidharan SP, Cohen R, Chew-Graham CA, Malpass A. Understanding  
836 ethnic inequalities in mental healthcare in the UK: A meta-ethnography. *PLoS Med.* 2022  
837 Dec;19(12):e1004139.
- 838 4. Halvorsrud K, Nazroo J, Otis M, Brown Hajdukova E, Bhui K. Ethnic inequalities and pathways  
839 to care in psychosis in England: a systematic review and meta-analysis. *BMC Med.* 2018 Dec  
840 12;16(1):223.
- 841 5. Nazroo JY, Bhui KS, Rhodes J. Where next for understanding race/ethnic inequalities in severe  
842 mental illness? Structural, interpersonal and institutional racism. *Sociol Health Illn.* 2020 Feb  
843 27;42(2):262–76.
- 844 6. Department of Health and Social Care. Modernising the Mental Health Act: Increasing Choice,  
845 Reducing Compulsion [Internet]. 2018 [cited 2024 Feb 9]. Available from:  
846 [https://www.gov.uk/government/publications/modernising-the-mental-health-act-final-](https://www.gov.uk/government/publications/modernising-the-mental-health-act-final-report-from-the-independent-review)  
847 [report-from-the-independent-review](https://www.gov.uk/government/publications/modernising-the-mental-health-act-final-report-from-the-independent-review)
- 848 7. Molyneaux E, Turner A, Candy B, Landau S, Johnson S, Lloyd-Evans B. Crisis-planning  
849 interventions for people with psychotic illness or bipolar disorder: systematic review and  
850 meta-analyses. *BJPsych Open.* 2019 Jul 13;5(4):e53.
- 851 8. Tinland A, Loubière S, Mougeot F, Jouet E, Pontier M, Baumstarck K, et al. Effect of Psychiatric  
852 Advance Directives Facilitated by Peer Workers on Compulsory Admission Among People  
853 With Mental Illness. *JAMA Psychiatry.* 2022 Aug 1;79(8):752.
- 854 9. de Jong MH, Kamperman AM, Oorschot M, Priebe S, Bramer W, van de Sande R, et al.  
855 Interventions to Reduce Compulsory Psychiatric Admissions. *JAMA Psychiatry.* 2016 Jul  
856 1;73(7):657.
- 857 10. Barrett B, Waheed W, Farrelly S, Birchwood M, Dunn G, Flach C, et al. Randomised Controlled  
858 Trial of Joint Crisis Plans to Reduce Compulsory Treatment for People with Psychosis:  
859 Economic Outcomes. *PLoS One.* 2013 Nov 25;8(11):e74210.
- 860 11. Owen GS, Gergel T, Stephenson LA, Hussain O, Rifkin L, Keene AR. Advance decision-making  
861 in mental health – Suggestions for legal reform in England and Wales. *Int J Law Psychiatry.*  
862 2019 May;64:162–77.
- 863 12. Department of Health and Social Care & Ministry of Justice. Draft Mental Health Bill  
864 [Internet]. 2022 [cited 2024 Feb 9]. Available from:  
865 <https://www.gov.uk/government/publications/draft-mental-health-bill-2022>
- 866 13. Parkman SE, Davies SN, Leese M, Phelan M, Thornicroft G. Ethnic differences in satisfaction  
867 with mental health services among representative people with psychosis in South London:  
868 PRISM Study 4. *British Journal of Psychiatry.* 1997 Sep 3;171(3):260–4.
- 869 14. The Sainsbury Centre for Mental Health. Breaking the Circles of Fear: A review of the  
870 relationship between mental health services and African and Caribbean communities.  
871 London; 2002.

- 872 15. Memon A, Taylor K, Mohebati LM, Sundin J, Cooper M, Scanlon T, et al. Perceived barriers to  
873 accessing mental health services among black and minority ethnic (BME) communities: a  
874 qualitative study in Southeast England. *BMJ Open*. 2016 Nov 16;6(11):e012337.
- 875 16. Swanson J, Swartz M, Ferron J, Elbogen E, Van Dorn R. Psychiatric advance directives among  
876 public mental health consumers in five U.S. cities: prevalence, demand, and correlates. *J Am  
877 Acad Psychiatry Law*. 2006;34(1):43–57.
- 878 17. Thornicroft G, Farrelly S, Szmukler G, Birchwood M, Waheed W, Flach C, et al. Clinical  
879 outcomes of Joint Crisis Plans to reduce compulsory treatment for people with psychosis: A  
880 randomised controlled trial. *The Lancet*. 2013;381(9878):1634–41.
- 881 18. Joint Committee on the Draft Mental Health Bill. Draft Mental Health Bill 2022 - Report of  
882 Session 2022–23 [Internet]. 2023 [cited 2024 Feb 9]. Available from:  
883 <https://publications.parliament.uk/pa/jt5803/jtselect/jtmentalhealth/696/report.html>
- 884 19. Sellars M, Fullam R, O’Leary C, Mountjoy R, Mawren D, Weller P, et al. Australian  
885 Psychiatrists’ Support for Psychiatric Advance Directives: Responses to a Hypothetical  
886 Vignette. *Psychiatry, Psychology and Law*. 2017 Jan 2;24(1):61–73.
- 887 20. Farrelly S, Lester H, Rose D, Birchwood M, Marshall M, Waheed W, et al. Barriers to shared  
888 decision making in mental health care: qualitative study of the Joint Crisis Plan for psychosis.  
889 *Health Expect*. 2016 Apr;19(2):448–58.
- 890 21. NHS England. Patient and carer race equality framework. [cited 2024 Sep 23]; Available from:  
891 <https://www.england.nhs.uk/long-read/patient-and-carer-race-equality-framework/>
- 892 22. NHS England. Acute inpatient mental health care for adults and older adults [Internet]. [cited  
893 2024 Sep 23]. Available from: [https://www.england.nhs.uk/long-read/acute-inpatient-  
894 mental-health-care-for-adults-and-older-adults/](https://www.england.nhs.uk/long-read/acute-inpatient-mental-health-care-for-adults-and-older-adults/)
- 895 23. Babatunde A, Simpson A, Gilbert S, Simpson A, Stephenson L, Owen G, et al. People, process  
896 and power: implementing advance choice documents for Black people in mental healthcare.  
897 *PsyArXiv*. 2024;
- 898 24. Babatunde A, Ruck Keene A, Simpson A, Gilbert S, Stephenson L, Chua KC, et al. Advance  
899 Statements for Black African and Caribbean people (AdStAC): protocol for an implementation  
900 study. *BMC Psychiatry*. 2023 May 17;23(1):344.
- 901 25. Langlely GJ, Moen RD, Nolan KM, Nolan TW, Norman CL, Provost LP. *The Improvement Guide:  
902 A Practical Approach to Enhancing Organizational Performance*. 2nd ed. John Wiley & Sons;  
903 2009.
- 904 26. Office for National Statistics. Ethnic group - Census Maps, ONS [Internet]. 2022 [cited 2023  
905 Dec 3]. Available from: [https://www.ons.gov.uk/census/maps/choropleth/identity/ethnic-  
906 group/ethnic-group-tb-6a/black-black-british-black-welsh-caribbean-or-african](https://www.ons.gov.uk/census/maps/choropleth/identity/ethnic-group/ethnic-group-tb-6a/black-black-british-black-welsh-caribbean-or-african)
- 907 27. Hayes D, Camacho EM, Ronaldson A, Stepanian K, McPhilbin M, Elliott RA, et al. Evidence-  
908 based Recovery Colleges: developing a typology based on organisational characteristics,  
909 fidelity and funding. *Soc Psychiatry Psychiatr Epidemiol*. 2023 Mar 11;
- 910 28. MHA - Advance Choice Documents - Welcome [Internet]. [cited 2024 Sep 23]. Available from:  
911 <https://mha-advancechoicedocuments.co.uk/>

- 912 29. Stephenson LA, Gergel T, Ruck Keene A, Rifkin L, Owen G. The PACT advance decision-making  
913 template: preparing for Mental Health Act reforms with co-production, focus groups and  
914 consultation. *Int J Law Psychiatry*. 2020 Jul;71:101563.
- 915 30. Sonigra KR, Mclvor L, Payne-Gill J, Smith T, Beck A. A preliminary evaluation of Crisis Plus: a  
916 model for working with frequent users of psychiatric crisis and inpatient services. *Mental  
917 Health Review Journal*. 2023 Nov 9;28(4):350–61.
- 918 31. Lenagh-Glue J, O’Brien A, Dawson J, Thom K, Potiki J, Casey H, et al. A MAP to mental health:  
919 the process of creating a collaborative advance preferences instrument. *N Z Med J*. 2018 Nov  
920 30;131(1486):18–26.
- 921 32. Edge D, Degnan A, Cotterill S, Berry K, Baker J, Drake R, et al. Culturally adapted Family  
922 Intervention (CaFI) for African-Caribbean people diagnosed with schizophrenia and their  
923 families: a mixed-methods feasibility study of development, implementation and  
924 acceptability. *Health Services and Delivery Research*. 2018 Sep;6(32):1–316.
- 925 33. Gaba DM. The future vision of simulation in health care. *Qual Saf Health Care*. 2004 Oct  
926 1;13(suppl\_1):i2–10.
- 927 34. Proctor EK, Powell BJ, McMillen JC. Implementation strategies: recommendations for  
928 specifying and reporting. *Implementation Science*. 2013 Dec 1;8(1):139.
- 929 35. Waltz TJ, Powell BJ, Fernández ME, Abadie B, Damschroder LJ. Choosing implementation  
930 strategies to address contextual barriers: diversity in recommendations and future directions.  
931 *Implementation Science*. 2019 Dec 29;14(1):42.
- 932 36. Braun V, Clarke V. Using thematic analysis in psychology. *Qual Res Psychol*. 2006 Jan;3(2):77–  
933 101.
- 934 37. Weiner BJ, Lewis CC, Stanick C, Powell BJ, Dorsey CN, Clary AS, et al. Psychometric  
935 assessment of three newly developed implementation outcome measures. *Implement Sci*.  
936 2017 Aug 29;12(1):108.
- 937 38. Henderson RC, Williams P, Gabbidon J, Farrelly S, Schauman O, Hatch S, et al. Mistrust of  
938 mental health services: ethnicity, hospital admission and unfair treatment. *Epidemiol  
939 Psychiatr Sci*. 2015 Jun 17;24(3):258–65.
- 940 39. Farrelly S, Lester H, Rose D, Birchwood M, Marshall M, Waheed W, et al. Improving  
941 Therapeutic Relationships. *Qual Health Res*. 2015 Dec 12;25(12):1637–47.
- 942 40. Rixe J, Neumann E, Möller J, Macdonald L, Wrona E, Bender S, et al. Joint crisis plans and  
943 crisis cards in inpatient psychiatric treatment. *Dtsch Arztebl Int*. 2023 Feb 24;
- 944 41. Powell BJ, Waltz TJ, Chinman MJ, Damschroder LJ, Smith JL, Matthieu MM, et al. A refined  
945 compilation of implementation strategies: results from the Expert Recommendations for  
946 Implementing Change (ERIC) project. *Implement Sci*. 2015 Feb 12;10:21.
- 947 42. Bunce AE, Groß I, Davis J V., Cowburn S, Cohen D, Oakley J, et al. Lessons learned about the  
948 effective operationalization of champions as an implementation strategy: results from a  
949 qualitative process evaluation of a pragmatic trial. *Implementation Science*. 2020 Dec  
950 1;15(1):87.

- 951 43. Salla A, Newbigging K, Joseph D, Eneje E. A conceptual framework for culturally appropriate  
952 advocacy with racialised groups. *Front Psychiatry*. 2023;14:1173591.
- 953 44. UN Office of the High Commissioner for Human Rights (OHCHR). Handbook for  
954 parliamentarians on the Convention on the Rights of Persons with disability: from exclusion  
955 to equality realizing the rights of persons with disabilities [Internet]. [cited 2024 Sep 20].  
956 Available from: <http://archive.ipu.org/PDF/publications/disabilities-e.pdf>
- 957 45. Hayes D, Hunter-Brown H, Camacho E, McPhilbin M, Elliott RA, Ronaldson A, et al.  
958 Organisational and student characteristics, fidelity, funding models, and unit costs of  
959 recovery colleges in 28 countries: a cross-sectional survey. *Lancet Psychiatry*. 2023  
960 Oct;10(10):768–79.
- 961 46. Ministry of Justice. Restricted Patients Statistics, England and Wales, 2023 [Internet]. [cited  
962 2024 Sep 25]. Available from: [https://www.gov.uk/government/statistics/restricted-patients-](https://www.gov.uk/government/statistics/restricted-patients-statistics-england-and-wales-2023)  
963 [statistics-england-and-wales-2023](https://www.gov.uk/government/statistics/restricted-patients-statistics-england-and-wales-2023)
- 964 47. Kings College London. Advance Choice Documents Implementation (ACDI) [Internet]. [cited  
965 2024 Sep 20]. Available from: <https://www.kcl.ac.uk/research/acdi>

966

967

## 968 Additional files

969

970 File name: Additional file 1

971 File format: Microsoft Word Document, DOC

972 Title of data: Additional project strategies

973 Description: Project strategies not directly a part of the implementation resource described in the  
974 paper

975

976 File name: Additional file 2

977 File format: Microsoft Excel Worksheet, XLS

978 Title of data: Summary of CFIR barrier constructs and the related ERIC and AdStAC strategies

979 Description: Summaries of the CFIR constructs (barriers) to ACD implementations matched with ERIC  
980 strategies to implement ACDs and the AdStAC strategies that correspond

981

982 File name: Additional file 3

983 File format: Microsoft Excel Worksheet, XLS

984 Title of data: Service user ratings of the acceptability, appropriateness, and feasibility of their ACD



985 Description: Service user participant responses to AIM, IAM, and FIM measures after ACD  
986 completion

987

988 File name: Additional file 4

989 File format: Microsoft Excel Worksheet, XLS

990 Title of data: Staff ratings of the acceptability, appropriateness, and feasibility of ACDs they worked  
991 on

992 Description: Staff participant responses to AIM, IAM, and FIM measures after ACD completion

993

994

## 995 **Declarations**

### 996 **Ethics approval and consent to participate**

997 Approval for the study was granted by the Bradford Leeds NHS Health Research Authority Research  
998 Ethics Committee (REC reference number: 22/YH/0012) on 07/02/2022. All study participants  
999 provided informed consent before they took part in the study.

1000

### 1001 **Consent for publication**

1002 No identifiable information of individuals included in the manuscript.

1003

### 1004 **Availability of data and materials**

1005 ACD resources are available on request from CH at [claire.1.henderson@kcl.ac.uk](mailto:claire.1.henderson@kcl.ac.uk)

1006 Quantitative data are available on reasonable request; however, qualitative data and ACD content  
1007 are not due to risk of reidentification.

1008

### 1009 **Competing interests**

1010 The authors have no competing interest to declare.

1011

### 1012 **Funding**

1013 This study is funded by Maudsley Charity. ACD films were funded by Health Education England.

1014

## 1015 **Authors' contributions**

1016

1017 Advisory groups – AS chaired the staff advisory group meetings. SGi chaired the lived-experience  
1018 advisory group meetings.

- 1019 ACD template workshop – ABa, CH, and SS facilitated the co-production workshops.
- 1020 Simulation workshops and training – ABa, CH, MF and MS facilitated the co-production workshops.
- 1021 ABi, AKS, CH, MF and MS facilitated the training, with support from ABa and JS. SGa analysed data
- 1022 collected from trainee surveys.
- 1023 Recovery College course workshop and training – ABa and PE facilitated the co-production
- 1024 workshops. FC, PE, ABa, and JS developed the course. FC and PE led the facilitation of the course,
- 1025 ABa and JS supported. ABa and JS held and recorded the feedback session.
- 1026 ACD creation – ABa, CH, and SS developed and revised the ACD template, JS also revised. CH
- 1027 developed the facilitator manual and led facilitator supervision. FC facilitated the creation of service
- 1028 user ACDs. JS collected baseline and follow-up data, transcribed interviews and analysed transcripts.
- 1029 ABa checked the created coding framework for reliability. FH led monthly staff meetings, supported
- 1030 by CH and JS.
- 1031 Films – SS, SGi, and JS were a part of filmed interviews on ACDs.
- 1032 Manuscript – JS led on drafting and editing the manuscript. All other authors reviewed, edited, and
- 1033 approved the final manuscript.
- 1034

## Acknowledgement

- 1035
- 1036
- 1037 Within the NHS Trust - Recovery College; Maudsley Learning; Patient and Carer Race Equality
- 1038 Framework team; Staff BME forum; Lewisham Crisis Plus team; Simone Myers, Lewisham EDI lead;
- 1039 and Southwark: Trauma Informed Care Implementation Group. Staff and lived experience advisory
- 1040 groups; AdStAC project steering committee; Black Thrive: Culturally Appropriate Advocacy and Peer
- 1041 Support service; and Croydon BME forum.
- 1042

## Tables too large for one page

1043

1044

1045 **Table 2 t-test results of pre-and post- simulation training survey scores**

|                                                                |               | Paired sample characteristics |      |      | Paired samples test |           |          |                          |       |             |
|----------------------------------------------------------------|---------------|-------------------------------|------|------|---------------------|-----------|----------|--------------------------|-------|-------------|
|                                                                |               | Mean                          | SD   |      | <i>t</i>            | <i>df</i> | <i>p</i> | 95% Confidence Intervals |       |             |
|                                                                |               |                               |      |      |                     |           |          | Lower                    | Upper | Effect size |
| Overall knowledge, confidence and understanding of ACD ratings | Pre-training  | 3.17                          | 0.81 | Pair | -5.26               | 5         | <0.05*   | -1.55                    | -0.53 | -2.15       |
|                                                                | Post-training | 4.21                          | 0.2  |      |                     |           |          |                          |       |             |
| Confidence score in understanding what an ACD is               | Pre-training  | 2.16                          | 0.75 | Pair | 2.015               | 5         | 0.051    | -                        | -     | -           |
|                                                                | Post-training | 1.5                           | 0.55 |      |                     |           |          | -                        | -     | -           |
| Ability score to                                               | Pre-          | 2                             | 0.63 | Pair | 1.581               | 5         | 0.087    | -                        | -     | -           |

|                                                                                                                                   |               |      |      |      |       |   |        |   |   |   |
|-----------------------------------------------------------------------------------------------------------------------------------|---------------|------|------|------|-------|---|--------|---|---|---|
| explain to others what an ACD is                                                                                                  | training      |      |      |      |       |   |        |   |   |   |
|                                                                                                                                   | Post-training | 1.67 | 0.52 |      |       |   |        | - | - | - |
| Confidence score in ability to complete an ACD                                                                                    | Pre-training  | 3.17 | 0.75 |      |       |   |        | - | - | - |
|                                                                                                                                   | Post-training | 2    | 0.63 | Pair | 2.906 | 5 | 0.016* | - | - | - |
| Understanding score of who can and should be involved in ACD                                                                      | Pre-training  | 2.5  | 0.55 |      |       |   |        | - | - | - |
|                                                                                                                                   | Post-training | 1.67 | 0.52 | Pair | 2.711 | 5 | 0.021* | - | - | - |
| Understanding score of how to complete ACDs that are trauma informed                                                              | Pre-training  | 3.5  | 1.04 |      |       |   |        | - | - | - |
|                                                                                                                                   | Post-training | 2    | 0.89 | Pair | 4.391 | 5 | 0.000* | - | - | - |
| Understanding score of how to complete ACDs that respect and value protected characteristics, cultural, and spiritual backgrounds | Pre-training  | 3    | 1.09 |      |       |   |        | - | - | - |
|                                                                                                                                   | Post-training | 1.67 | 0.52 | Pair | 4     | 5 | 0.005* | - | - | - |
| Ability score to implement a model of decision making that is shared between service users, carers, and healthcare professionals  | Pre-training  | 3    | 0.89 |      |       |   |        | - | - | - |
|                                                                                                                                   | Post-training | 1.83 | 0.75 | Pair | 3.796 | 5 | 0.006  | - | - | - |
| Ability score to identify and approach some of the complexities that may arise when making advanced choice documents              | Pre-training  | 3.33 | 0.51 |      |       |   |        | - | - | - |
|                                                                                                                                   | Post-training | 2    | 0.63 | Pair | 4     | 5 | 0.005* | - | - | - |

1046

1047 Table 3: Demographics of service user participants

| Category | Total (n) |
|----------|-----------|
| Age      |           |

|                                                  |                                                                                  |
|--------------------------------------------------|----------------------------------------------------------------------------------|
| 16-25                                            | 1                                                                                |
| 26-35                                            | 5                                                                                |
| 36-45                                            | 4                                                                                |
| 46-55                                            | 4                                                                                |
| 56-65                                            | 1                                                                                |
| <b>Recorded sex</b>                              |                                                                                  |
| Female                                           | 9                                                                                |
| Male                                             | 6                                                                                |
| <b>Ethnicity</b>                                 |                                                                                  |
| Black African                                    | 6                                                                                |
| Black British                                    | 5                                                                                |
| Mixed                                            | 2 (Afro-Caribbean & white English and Scottish; Black Caribbean and white Irish) |
| Black Other                                      | 1 (Black British Caribbean)                                                      |
| Black Caribbean                                  | 1                                                                                |
| <b>Highest level of formal education</b>         |                                                                                  |
| University undergraduate degree                  | 6                                                                                |
| Secondary school education                       | 4                                                                                |
| Post secondary education                         | 4                                                                                |
| University postgraduate degree                   | 1                                                                                |
| <b>Housing situation</b>                         |                                                                                  |
| Own house, flat or apartment (including council) | 12                                                                               |
| Live with others (in their house)                | 3                                                                                |
| <b>Living arrangement</b>                        |                                                                                  |
| I live alone                                     | 8                                                                                |
| My parent(s) or relatives                        | 4                                                                                |
| My children                                      | 3                                                                                |
| <b>Employment status</b>                         |                                                                                  |
| I'm not able to work (disabled)                  | 6                                                                                |
| I'm looking for a job                            | 3                                                                                |
| I work part-time                                 | 3                                                                                |
| I work full-time                                 | 2                                                                                |
| I work as a volunteer (not paid)                 | 1                                                                                |
| <b>Reported Diagnosis</b>                        |                                                                                  |
| Schizophrenia                                    | 3                                                                                |
| Paranoid schizophrenia                           | 3                                                                                |
| Psychosis                                        | 3                                                                                |
| Bipolar disorder                                 | 2                                                                                |

|                                           |   |
|-------------------------------------------|---|
| Schizoaffective disorder                  | 3 |
| Anxiety and depression                    | 1 |
| EUPD                                      | 1 |
| <b>Agreement with diagnosis</b>           |   |
| I agree fully                             | 8 |
| I disagree fully                          | 3 |
| I agree partially                         | 3 |
| Not sure                                  | 1 |
| <b>Age of first contact with services</b> |   |
| 16-25                                     | 9 |
| 26-35                                     | 3 |
| 36-45                                     | 2 |
| 46-55                                     | 1 |
| <b>Number of admissions</b>               |   |
| 1                                         | 1 |
| 2-5                                       | 9 |
| 6-10                                      | 3 |
| More than 10                              | 2 |
| <b>Number of admissions under section</b> |   |
| One                                       | 3 |
| Some                                      | 4 |
| All                                       | 8 |

1048

1049

1050

1051

1052

1053 Table 6: Service user interview excerpts

1054

| Theme   | Subthemes and excerpts                                                                                                                                                                                                                                                                                                                                                                                                               |
|---------|--------------------------------------------------------------------------------------------------------------------------------------------------------------------------------------------------------------------------------------------------------------------------------------------------------------------------------------------------------------------------------------------------------------------------------------|
| Process | Staff involvement                                                                                                                                                                                                                                                                                                                                                                                                                    |
|         | “Ohh, I think [the care team's input] was fine. I think my care coordinator is, I've been there for a couple of years now, so she kind of has an understanding of what I've been going through, so it was, it was fine. With the doctors it's different because that, in the service, like I don't get the same doctor every time. It changes continuously so that doctor doesn't, we don't really get to build a rapport with them” |
|         | “It was also good to have [member of care team/psychologist] for the first session in so far as she was able to, umm, refine some things or remind of some things and sort of guide the session a little bit or provide context in ways that I actually needed at different times”                                                                                                                                                   |
|         | Facilitator involvement                                                                                                                                                                                                                                                                                                                                                                                                              |
|         | “[The facilitator] was so patient. She was understanding she she made sure there was clarity with what I was trying to express and she really took her                                                                                                                                                                                                                                                                               |

|          |                                                                                                                                                                                                                                                                                                                                                                                                                                                                                                                                                                                                                                                                                                                                                                                                                                                                                                                                                                                                                                                                                                                                                                                                                                                                                                                                                                                                                     |
|----------|---------------------------------------------------------------------------------------------------------------------------------------------------------------------------------------------------------------------------------------------------------------------------------------------------------------------------------------------------------------------------------------------------------------------------------------------------------------------------------------------------------------------------------------------------------------------------------------------------------------------------------------------------------------------------------------------------------------------------------------------------------------------------------------------------------------------------------------------------------------------------------------------------------------------------------------------------------------------------------------------------------------------------------------------------------------------------------------------------------------------------------------------------------------------------------------------------------------------------------------------------------------------------------------------------------------------------------------------------------------------------------------------------------------------|
|          | <p>time. Which is, which is really, she tried to put herself in in my, she was empathetic, let me say that. There was empathy there, which I really, really appreciated.”</p> <p>“I think just sort of like support around the whole thing, it's just like, OK, I am taking all these down and you know and you're you're always free to amend or change and add to it as you see needed. Maybe just having that said a few more times during like the the sessions would be would be a good thing for people like me, that's all.”</p>                                                                                                                                                                                                                                                                                                                                                                                                                                                                                                                                                                                                                                                                                                                                                                                                                                                                             |
|          | <p style="text-align: center;">Demands</p> <p>“It was at times emotional remembering some of the things that I've experienced. But I did feel like I was supported and cared for in the process.”</p> <p>“The actual process was quick, but getting the feedback took a little while. I did it in April and I didn't receive the feedback until July, so I don't know whether that that means there's been improvement there or if it's just something that normally happens. But it's just, it felt like a long time to get the feedback back after doing the initial appointment.”</p>                                                                                                                                                                                                                                                                                                                                                                                                                                                                                                                                                                                                                                                                                                                                                                                                                            |
|          | <p style="text-align: center;">Quality of ACD</p> <p>“[My ACD] seems like a very well done, well presented document that I'd be happy for mental health teams to see in the future. Um, this seems like a very just well put document something that I'd be happy for anyone to see really.”</p> <p>“The facilitator said she said she's gonna send me a final copy... they sent me a PDF copy of it with, just for me to check if there's any alterations required, I replied to her with...what needs to be changed and then, i think she said she'll get back to me. So that needs to be checked up a bit more, there's a few issues that I had to correct on it. They said they received the corrections. I think they said they'll let me know when it's been corrected. So that needs to be followed up as well.”</p>                                                                                                                                                                                                                                                                                                                                                                                                                                                                                                                                                                                         |
| Benefits | <p style="text-align: center;">Drive to complete</p> <p>“As a minority woman I felt it was really important to have my voice heard because two of the most, two of the most distressing factors of being in an institution was one, immediately I was deemed aggressive and I wasn't, particularly aggressive. My, obviously everything was very heightened, but I remember, they sort of took me and and didn't explain to me what the medication was. I've not been raised on western medication. So instead of that I experienced restraint...and I just felt, I felt it's, I mean there's been a lot of research into how Black people are categorised in mental health. How we're given certain diagnosis, that apparently are almost like trends at that time, like for example, schizophrenia, lots of Black males were told they had schizophrenia over a period of time in the 80s and 90s. And I think if you're a woman of colour and you are advocating for your rights, they, I just felt they just wanted me to be silent and doped up.”</p> <p>“I wanted to complete an advance statement due to the treatment that I received the second time that I was sectioned. I wanted to be, for people to be clear, including like my family and the people who are, i'm in the care of, to understand the kind of person that I am and also my requirements if I would need to be hospitalised again.”</p> |
|          | <p style="text-align: center;">On taking part</p> <p>“It made me feel more, complete. It's had me reflect on who I am and what I know to be true about me. And I think, it's helped me to integrate my</p>                                                                                                                                                                                                                                                                                                                                                                                                                                                                                                                                                                                                                                                                                                                                                                                                                                                                                                                                                                                                                                                                                                                                                                                                          |

|           |                                                                                                                                                                                                                                                                                                                                                                                                                                                                                                                                                                                                                                                                                                                                                                                                                                                                                                                                                                                                                                                                                                                                                                                                                                                                                                                                                                                                                                                                                                                                                                                                                                                                                                                                                                                                 |
|-----------|-------------------------------------------------------------------------------------------------------------------------------------------------------------------------------------------------------------------------------------------------------------------------------------------------------------------------------------------------------------------------------------------------------------------------------------------------------------------------------------------------------------------------------------------------------------------------------------------------------------------------------------------------------------------------------------------------------------------------------------------------------------------------------------------------------------------------------------------------------------------------------------------------------------------------------------------------------------------------------------------------------------------------------------------------------------------------------------------------------------------------------------------------------------------------------------------------------------------------------------------------------------------------------------------------------------------------------------------------------------------------------------------------------------------------------------------------------------------------------------------------------------------------------------------------------------------------------------------------------------------------------------------------------------------------------------------------------------------------------------------------------------------------------------------------|
|           | <p>mental health experiences with me when I'm well. And so, I feel like I have a better picture of myself in totality. As a person versus my mental health is separate from me as a person and and that sad, disappointing, scary part of me...it just sort of helped me to integrate, I would say. Or it was an opportunity for me to integrate.”</p> <p>“Made me feel about myself?...so take more control, I'm taking more control of my mental health, considering all these admissions I've had over the years, it makes me feel I have a say in my care for the first time, yeah. It made me to feel I've taken control of my care”</p> <p style="text-align: center;">Hope</p> <p>“Well, it's, it's for [the police's] education. You know, the police need to educate themselves. It's very tempting as a, as a brown skin, as a Black person to to hate the police. It's very tempting to do that, but I like to try and see hope in everything and I hope that they can come to learn ethnic minorities on a deeper level because then that removes their fear of us and then you can have some sort of progress because you're working with a person, you're not working with a person that you see as a threat to you, and hopefully will reduce some of some of the kind of, you know, psychological microaggressions or actual violence. I mean, there's been many cases of of police murdering Black people with mental health.”</p> <p>“Just try and be part of the solution. Just try and be part of the solution. You know that that that's the only thing that we can do. Yes, we can rage and yes, and we can fight back and everything like that. That's all good as well. But try and find practical Solutions, long-term change, I think that's Our responsibility.”</p> |
| Honouring | Uncertainty                                                                                                                                                                                                                                                                                                                                                                                                                                                                                                                                                                                                                                                                                                                                                                                                                                                                                                                                                                                                                                                                                                                                                                                                                                                                                                                                                                                                                                                                                                                                                                                                                                                                                                                                                                                     |
|           | <p>“I feel confident that something is in place in case I become unwell and I'm just happy that my my preferences have been put in place beforehand and I believe I have confidence that the system will work, that the advance statement, you know if it needs to be implemented, it will work.”</p> <p>“I don't think [the police] would be that interested in advanced statements. I really don't. Yeah. I'd say it's a good idea if they wanna just make sure that people know how they would like to be dealt with and a bit about them before they just get seen as just another patient. But at the same time, like I just mentioned, I'm not too sure how, whether you know once we do something like this, whether it will actually be implemented or not, or the staff will actually use it to make decisions and what happens with us.”</p>                                                                                                                                                                                                                                                                                                                                                                                                                                                                                                                                                                                                                                                                                                                                                                                                                                                                                                                                          |
|           | Influencing factors                                                                                                                                                                                                                                                                                                                                                                                                                                                                                                                                                                                                                                                                                                                                                                                                                                                                                                                                                                                                                                                                                                                                                                                                                                                                                                                                                                                                                                                                                                                                                                                                                                                                                                                                                                             |
|           | <p>“I feel that if you know if a person is to ever do need psychiatric care, if it does get adhered to, then the potential to have a much more comfortable stay in hospital is there, but that's if it's really listened to and I feel like it might need an advocate for it, you know, if you become incoherent, um, and you're not able to refer back to it yourself, then maybe some advocacy would be complementary.”</p> <p>“Maybe I'm like 30%, 30 to 40% confident, because I think in high pressure situations people might not feel like they have the time to, really do, do the review and try to put things in, but going through the process has me feel a bit more at ease that I at least had a say in how I wanted my care to go.”</p>                                                                                                                                                                                                                                                                                                                                                                                                                                                                                                                                                                                                                                                                                                                                                                                                                                                                                                                                                                                                                                          |

1055

1056 Table 7: Staff interview excerpts

| Theme   | Subthemes and excerpts                                                                                                                                                                                                                                                                                                                                                                                                                                                                                                                                                                                                                                                                                                                                                                                                                                                                                                                                                                                                                                                                                                         |
|---------|--------------------------------------------------------------------------------------------------------------------------------------------------------------------------------------------------------------------------------------------------------------------------------------------------------------------------------------------------------------------------------------------------------------------------------------------------------------------------------------------------------------------------------------------------------------------------------------------------------------------------------------------------------------------------------------------------------------------------------------------------------------------------------------------------------------------------------------------------------------------------------------------------------------------------------------------------------------------------------------------------------------------------------------------------------------------------------------------------------------------------------|
| Process | Approach                                                                                                                                                                                                                                                                                                                                                                                                                                                                                                                                                                                                                                                                                                                                                                                                                                                                                                                                                                                                                                                                                                                       |
|         | <p>“I thought was a really nice collaborative process. I know that the service user we did it for, certainly enjoyed it. It was really beneficial having...an external facilitator kind of come in and do that as well, I think because it just guided our thinking. So yeah, it was, it was, I thought, was really helpful, as did, as did my client.”</p>                                                                                                                                                                                                                                                                                                                                                                                                                                                                                                                                                                                                                                                                                                                                                                    |
|         | <p>“There was a bit of a delay, which is, you know, probably inevitable in the paperwork being completed, erm which might have perhaps meant things went off the boil a little bit. Umm, I've actually still got some sections to look at err to complete, yeah....so I think I think between us having the interviews and the actual advance statement being written up for my clients comments and mine and the doctors erm you know there was several months. So, I think maybe you perhaps lose a little bit of momentum...Umm yeah, but I'm, I'm not, that's not a criticism, you know, I understand people are, you know, overwhelmed.”</p>                                                                                                                                                                                                                                                                                                                                                                                                                                                                              |
|         | Care team involvement                                                                                                                                                                                                                                                                                                                                                                                                                                                                                                                                                                                                                                                                                                                                                                                                                                                                                                                                                                                                                                                                                                          |
|         | <p>“There was one point when I erm where I kind of stepped in and wanted to kind of highlight and, you know, what, how somebody might misunderstand here. What might somebody see and how might that not be your normal self? Because it felt like compared to what I knew of the client and what they've shared with me in CBT, they were being a little bit more cautious in terms of what they were stating for the document.”</p>                                                                                                                                                                                                                                                                                                                                                                                                                                                                                                                                                                                                                                                                                          |
|         | <p>“The facilitator didn't know the client, but I was present and I did, so I was able to do that prompting and that might be the case for most people who complete it, that just the the fact of having somebody there who knows that means there's that bit of prompting if somebody isn't being that assertive...this was a client who was particularly self-critical, so [they] might say kind of well if I was coming across as kind of angry or aggressive or blah blah blah would describe things in quite judgmental language and I was kind of prompting [them] to be like, what exactly might you be saying? How else might somebody experience that erm rather than to kind of be critical of [themselves] in [their] describing of what [they] might be like when [they] was well, unwell, sorry. And so yeah, it might just be a facilitator is able to kind of keep an eye out for when people's self-esteem or self-criticism might impact on the completion process and and be ready to give a bit of a prompt if someone is using quite kind of, yeah, self, self-disparaging or self-critical language.”</p> |
|         | Independent facilitator impact                                                                                                                                                                                                                                                                                                                                                                                                                                                                                                                                                                                                                                                                                                                                                                                                                                                                                                                                                                                                                                                                                                 |
|         | <p>“One of the advantages I noticed that patient were able to talk about things they haven't been mentioning before in a consultation and with their meeting with with a care-coordinator, but they might be able to, there was, the patient was able to talk about it in, while we're being completing them, advance statement, and I think it give us a bit, little bit better understanding when patient might stop or refuse a treatment and a kind of, when we understand why it's happening, it's a field we can work on to just to improve kind of compliance and overall well-being.”</p>                                                                                                                                                                                                                                                                                                                                                                                                                                                                                                                              |
|         | <p>Yeah. So, in terms of the experience of getting them completed, it was a really positive experience erm with the client that I referred. I think she found it really useful and it was really helpful to kind of hear how kind of unbiased and open all of the questioning was with with her. So rather than</p>                                                                                                                                                                                                                                                                                                                                                                                                                                                                                                                                                                                                                                                                                                                                                                                                            |



|             |                                                                                                                                                                                                                                                                                                                                                                                                                                                                                                                                                                                                                                                                                                                                                                                                            |
|-------------|------------------------------------------------------------------------------------------------------------------------------------------------------------------------------------------------------------------------------------------------------------------------------------------------------------------------------------------------------------------------------------------------------------------------------------------------------------------------------------------------------------------------------------------------------------------------------------------------------------------------------------------------------------------------------------------------------------------------------------------------------------------------------------------------------------|
|             | trying to lead her to a particular response or erm entry in the document, it felt like there was lots and lots of effort to make sure it really reflected her preferences and her wishes. Erm, it seemed really, really helpful.                                                                                                                                                                                                                                                                                                                                                                                                                                                                                                                                                                           |
| Benefits    | For staff                                                                                                                                                                                                                                                                                                                                                                                                                                                                                                                                                                                                                                                                                                                                                                                                  |
|             | I haven't used [an ACD] yet, but I do know it's quite helpful. I mean my background is inpatient and community as well and I do know when people come in in a really terrible state, they don't, they can't tell you a lot, so I think knowing what their wish would be in terms of treatment helps a lot, professional, help professionals a lot to kind of make sure we're doing the right thing in supporting that person in that, in their recovery.                                                                                                                                                                                                                                                                                                                                                   |
|             | "I do a lot of CBT for people with bipolar disorder, so advanced planning and relapse prevention planning is part and parcel of that work all the time erm but certainly this project has prompted me to think a bit about how the person's kind of colour and cultural background might have a particular impact on their experience of mental health services in those crisis points."                                                                                                                                                                                                                                                                                                                                                                                                                   |
|             | For service users                                                                                                                                                                                                                                                                                                                                                                                                                                                                                                                                                                                                                                                                                                                                                                                          |
|             | "I think it's very useful to have our, umm, Black service users making advance statement. As we all know, there is this unconscious bias about Black service users using the service and the treatment they've had in the past. So, it's it's helpful that we can get their voice in the treatment and and also, yeah, and it gives them the confidence of accessing the service too, because a lot of them do not access the service for the simple reason that they know a lot of people in the past has not had the, had had been treated, I would say perhaps differently, but I know that's all changing as well. So it's nice to give them that confidence that the service is changing and they they've been heard and them having an advanced statement will be helpful in their recovery as well" |
|             | "So, I felt it was a very therapeutic interview. We did two, I I was involved in two actually erm I thought it was very positive about kind of, you know, uh, capturing my client's kind of personality that things that were important to [them] and the some of the distressing experiences [they'd] had. So, it did feel very positive."                                                                                                                                                                                                                                                                                                                                                                                                                                                                |
| Application | Barriers                                                                                                                                                                                                                                                                                                                                                                                                                                                                                                                                                                                                                                                                                                                                                                                                   |
|             | "I think erm you know, it would be important to have some kind of meetings with with relevant staff so that it is really given a high profile, because otherwise it may not got followed and then that would be detrimental actually if people have gone to the bother of doing it and then feel it's not being followed. That would be, you know, sort of worse actually than not doing it. You see what I mean? So that slightly concerns me because all these things are emergencies. I happen to be an [Approved Mental Health Professional]"                                                                                                                                                                                                                                                          |
|             | "I think for other people that I've used advance statements with where their preferences might be quite strong in terms of 'I'm always offered this medication, I hate this medication, I really don't want that, I want something different.' I can imagine that there might be more challenges with implementing it, because somebody might read well it's your preference, but that's not what I think you should have, and there might be more of a tension between what a team thinks is the right thing and what the person has requested."                                                                                                                                                                                                                                                          |
|             | Facilitators                                                                                                                                                                                                                                                                                                                                                                                                                                                                                                                                                                                                                                                                                                                                                                                               |
|             | "I think some something maybe where there was kind of champions or                                                                                                                                                                                                                                                                                                                                                                                                                                                                                                                                                                                                                                                                                                                                         |

|  |                                                                                                                                                                                                                                                                                                                                                                                                                                                                                                                                                                                                                                            |
|--|--------------------------------------------------------------------------------------------------------------------------------------------------------------------------------------------------------------------------------------------------------------------------------------------------------------------------------------------------------------------------------------------------------------------------------------------------------------------------------------------------------------------------------------------------------------------------------------------------------------------------------------------|
|  | <p>whatever, so there was somebody who would, you know, in the ward who would be responsible for, you know, yeah erm disseminating the information. Erm so that it, you know, like you might have a lead on the ward for carers or something. Somebody who would take on that role on on wards erm, because otherwise communication is notoriously difficult erm, because it's essential on the wards that this information is there."</p>                                                                                                                                                                                                 |
|  | <p>"To my recollection, [they] didn't request anything that would be really, really outside of normal care practices. So rather than thinking do, you know, actually people have a tendency to really misunderstand me and they really need to kind of pay lots of attention to this document before I receive any treatment otherwise, things can go terribly wrong. It felt more like some of [their] things were about I'd slightly preferred this over this and if I am on a ward, these are the kind of things I would like these are people that need to be contacted. So I think it'd be quite feasible for it to be followed."</p> |

1057
